# Supplementary material for: Functional validation of GPIHBP1 and identification of a functional mutation in GPIHBP1 for milk fat traits in dairy cattle
Source: PubMed Central journal article supplement (PMC5561204; doi:10.1038/s41598-017-08668-6), 2017-08-17
Supplement: 41598_2017_8668_MOESM1_ESM.pdf [file 41598_2017_8668_MOESM1_ESM.pdf]

# Functional validation of *GPIHBP1* and identification of a functional mutation in *GPIHBP1* for milk fat traits in dairy cattle

Jie Yang, Xuan Liu, Dan Wang, Chao Ning, Haifei Wang, Qin Zhang, Li Jiang\*

Table S1 Prediction of transcription factor binding sites for the four SNPs in the promoter region of *GPIHBP1*

| SNP | Matrix Family | Detailed Family Information                                  | Matrix          | Detailed Matrix Information                                                                                              | Strand | Matrixsim | Sequence*                               |
|-----|---------------|--------------------------------------------------------------|-----------------|--------------------------------------------------------------------------------------------------------------------------|--------|-----------|-----------------------------------------|
| G   | V\$TEAF       | TEA/ATTS DNA binding domain factors                          | V\$TEAD.01      | TEA domain-containing factors, transcriptional enhancer factors 1,3,4,5                                                  | (-)    | 0.951     | <b>c</b> ggCATTcctctg                   |
| G   | V\$STAF       | Selenocysteine tRNA activating factor                        | V\$ZNF76_143.01 | ZNF143 is the human ortholog of Xenopus Staf, ZNF76 is a DNA binding protein related to ZNF143 and Staf                  | (+)    | 0.917     | agaggaatg <b>c</b> gtCCCAgccggccctggggg |
| G   | V\$HDBP       | Huntington's disease gene regulatory region binding proteins | V\$HDBP1_2.01   | Huntington's disease gene regulatory region-binding protein 1 and 2 (SLC2A4 regulator and papillomavirus binding factor) | (-)    | 0.861     | ccagggCCG <b>G</b> ctggga <b>c</b> gg   |
| G   | V\$ZICF       | Members of ZIC-family, zinc finger protein of the cerebellum | V\$ZIC2.02      | Zic family member 2 (odd-paired Drosophila homolog) (secondary DNA binding preference)                                   | (+)    | 0.9       | <b>c</b> gtccCAGC <b>c</b> ggccc        |

|   |         |                                                                 |                 |                                                                                                                          |     |       |                                         |
|---|---------|-----------------------------------------------------------------|-----------------|--------------------------------------------------------------------------------------------------------------------------|-----|-------|-----------------------------------------|
| A | V\$TEAF | TEA/ATTS DNA binding domain factors                             | V\$TEAD.01      | TEA domain-containing factors, transcriptional enhancer factors 1,3,4,5                                                  | (-) | 0.953 | <u>tg</u> gCATTcctctg                   |
| A | V\$STAF | Selenocysteine tRNA activating factor                           | V\$ZNF76_143.01 | ZNF143 is the human ortholog of Xenopus Staf, ZNF76 is a DNA binding protein related to ZNF143 and Staf                  | (+) | 0.91  | agaggaat <u>gcc</u> atCCCAgcccgcctggggg |
| A | V\$HICF | Krüppel-like C2H2 zinc finger factors hypermethylated in cancer | V\$HIC1.01      | Hypermethylated in cancer 1                                                                                              | (+) | 0.961 | gaaTGCC <u>a</u> tccca                  |
| A | V\$ZF05 | C2H2 zinc finger transcription factors 5                        | V\$ZFP410.01    | Zinc finger protein 410, APA-1                                                                                           | (-) | 0.922 | cggctgGGA <u>T</u> ggcat                |
| A | V\$HDBP | Huntington's disease gene regulatory region binding proteins    | V\$HDBP1_2.01   | Huntington's disease gene regulatory region-binding protein 1 and 2 (SLC2A4 regulator and papillomavirus binding factor) | (-) | 0.842 | ccagggCCG <u>G</u> ctggga <u>t</u> gg   |
| A | V\$ZICF | Members of ZIC-family, zinc finger protein of the cerebellum    | V\$ZIC2.02      | Zic family member 2 (odd-paired Drosophila homolog) (secondary DNA binding preference)                                   | (+) | 0.9   | <u>ca</u> tccCAGCcgcccc                 |

\* The SNP sites were indicated by red letter with underline. The core sequence of the transcription factor binding sites are shown in upper case letters.

Table S2 Sequences of forward (F) and reverse (R) primers for real-time quantitative PCR

| Gene Names     | Sequences                                              | Amplicon size (bp) |
|----------------|--------------------------------------------------------|--------------------|
| <i>GPIHBP1</i> | F: CAAAGCCATCGTCTCCTCC<br>R: TCAGAGATCCGTCCACCGT       | 110                |
| <i>LPL</i>     | F: ACACAGCTGAGGACACTTGCC<br>R: GCCATGGATCACCACAAAGG    | 101                |
| <i>CD36</i>    | F: GTACAGATGCAGCCTCATTTC<br>R: TGGACCTGCAAATATCAGAGGA  | 81                 |
| <i>VLDLR</i>   | F: GCCCAGAACAGTGCCATATGA<br>R: TTTTCACCATCACACCGCC     | 103                |
| <i>ACACA</i>   | F: CATCTTGTCCGAAACGTCGAT<br>R: CCCTTCGAACATACACCTCCA   | 101                |
| <i>FASN</i>    | F: ACCTCGTGAAGGCTGTGACTCA<br>R: TGAGTCGAGGCCAAGGTCTGAA | 92                 |
| <i>GAPDH</i>   | F: GGTGCTGAGTATGTGGTGGGA<br>R: GGCATTGCTGACAATCTTGA    | 180                |

Table S3 Sequences of forward (F) and reverse (R) primers for SNP detection of *GPIHBP1*

| Primer Names | Sequences (5' -3' )    | Amplified fragment length(bp) | Position                    |
|--------------|------------------------|-------------------------------|-----------------------------|
| F1           | CCTAACACTGCTGGGAACCT   | 2155                          | Chr14:2554368-Chr14:2554349 |
| R1           | GGCTCTGAATCTGTGGGAAG   |                               | Chr14:2552233-Chr14:2552216 |
| F2           | CCCGTAGGATGAAGGCACT    | 383/352/344                   | Chr14:2552171-Chr14:2552154 |
| R2           | GTCCTGCTGATGGCTTGAC    |                               | Chr14:2550578-Chr14:2550560 |
| F3           | CATGCAAAGCCATCGTCTC    | 388                           | Chr14:2550759-Chr14:2550741 |
| R3           | TCATCACAGGTGCTTCCAGT   |                               | Chr14:2550288-Chr14:2550269 |
| F4           | GGACATGCAAAGCCATCGT    | 428                           | Chr14:2550743-Chr14:2550762 |
| R4           | GACAGGAGACAGCGGACAGA   |                               | Chr14:2550314-Chr14:2550333 |
| F5           | TGGAGGCTGACAGTGAGGAA   | 628                           | Chr14:2551369-Chr14:2551388 |
| R5           | GGAGGAGACGATGGCTTTG    |                               | Chr14:2550737-Chr14:2550756 |
| F6           | TCAGAGGGACTGGGAAGGG    | 397                           | Chr14:2551668-Chr14:2551687 |
| R6           | CAGGGTGAGAAATGAGGGTGT  |                               | Chr14:2551269-Chr14:2551289 |
| F7           | CCGTAGGATGAAGGCACTG    | 565                           | Chr14:2552152-Chr14:2552171 |
| R7           | GGACACCTGTAAACCTCCACTA |                               | Chr14:2551584-Chr14:2551605 |

Table S4 Sequences of forward (F) and reverse (R) primers for PCR amplification of different bovine GPIHBP1 promoter region

| Names        | Sequences (5' -3' )*            | Amplified fragment length (bp) | Position   |
|--------------|---------------------------------|--------------------------------|------------|
| GPIHBP1-P-F1 | TTTGGAggtaccAGTGCTGCTGGGAGAGGG  | 482                            | -509—492   |
| GPIHBP1-P-F2 | CGGAggtaccCACTGGCAGGAAAAGGCA    | 1413                           | -1440—1423 |
| GPIHBP1-P-F3 | CGGAggtaccCAATCTCTGCTCCAAGTGCTC | 1646                           | -1673—1653 |
| GPIHBP1-P-F4 | CGGAggtaccCCTAACACTGCTGGGAACCT  | 2177                           | -2204—2185 |
| GPIHBP1-P-R  | TTTTagatctGGCTCTGAATCTGTGGGAAG  |                                | -69—49     |

\* All of the forward primers contain KpnI restriction site. The reverse primer contains Bgl II restriction site. The enzyme cutting sites are shown in lower case letters. For each fragment, the same reverse primer was used for amplification.

Table S5 Sequences of forward (F) and reverse (R) primers for site-directed mutagenesis

| Names          | Sequences(5'-3')*                      | Mutation Site*     |
|----------------|----------------------------------------|--------------------|
| GPIHBP1-mut1-F | CAGAGGAATGCCaTCCCAGCCGGCCCTGGGGGCACTCT | GCGA- <u>A</u> CGA |
| GPIHBP1-mut1-R | TGGGAiGGCATTCTCTGCAGTCTCAGCCACCAAGCATC |                    |
| GPIHBP1-mut2-F | GAGGAATGCCgTCCCAGCCGGCCCTGGGGGCACTCT   | AAAG- <u>G</u> AAG |
| GPIHBP1-mut2-R | TGGGAcGGCATTCTCTGCAGTCTCAGCCACCAAGCATC |                    |

\*: The mutation sites were indicated by underline..

Table S6 Oligonucleotides used in EMSA experiments

| Name of probe  | Sequences (5'-3')*                               |
|----------------|--------------------------------------------------|
| Probe-wild     | Biotin-5-GCAGAGGAATGCC <u>G</u> TCCCAGCCGGCCCT-3 |
| Probe-mutation | Biotin-5-GCAGAGGAATGCC <u>A</u> TCCCAGCCGGCCCT-3 |

\* The SNP sites were indicated by underline.
